# Supplementary material for: Comparative full-length transcriptome analysis by Oxford Nanopore Technologies reveals genes involved in anthocyanin accumulation in storage roots of sweet potatoes (Ipomoea batatas L.)
Source: PeerJ. 2022 Jul 12;10:e13688. doi: 10.7717/peerj.13688 (PMC9285475; doi:10.7717/peerj.13688)
Supplement: Table S3 [file peerj-10-13688-s003.xlsx]

## Sheet: Sheet1
SampleID	cleanReadNumers(except rRNA)	flncReadNumbers	flncRatio
PH01	3417537	2599258	0.7606
PH02	2567514	1946001	0.7579
PH03	3353869	2590334	0.7723
PL01	2304691	1625771	0.7054
PL02	3148868	2260773	0.718
PL03	2237871	1642553	0.734
WH01	3346278	2443149	0.7301
WH02	2439875	1828315	0.7493
WH03	2447337	1851875	0.7567
WL01	3267362	2574544	0.788
WL02	2271713	1702229	0.7493
WL03	2990662	2370408	0.7926
