# Supplementary figures and images for: Comparative full-length transcriptome analysis by Oxford Nanopore Technologies reveals genes involved in anthocyanin accumulation in storage roots of sweet potatoes ( Ipomoea batatas L.)
Source: PeerJ journal article supplement (doi:10.7717/peerj.13688), 2022-07-12

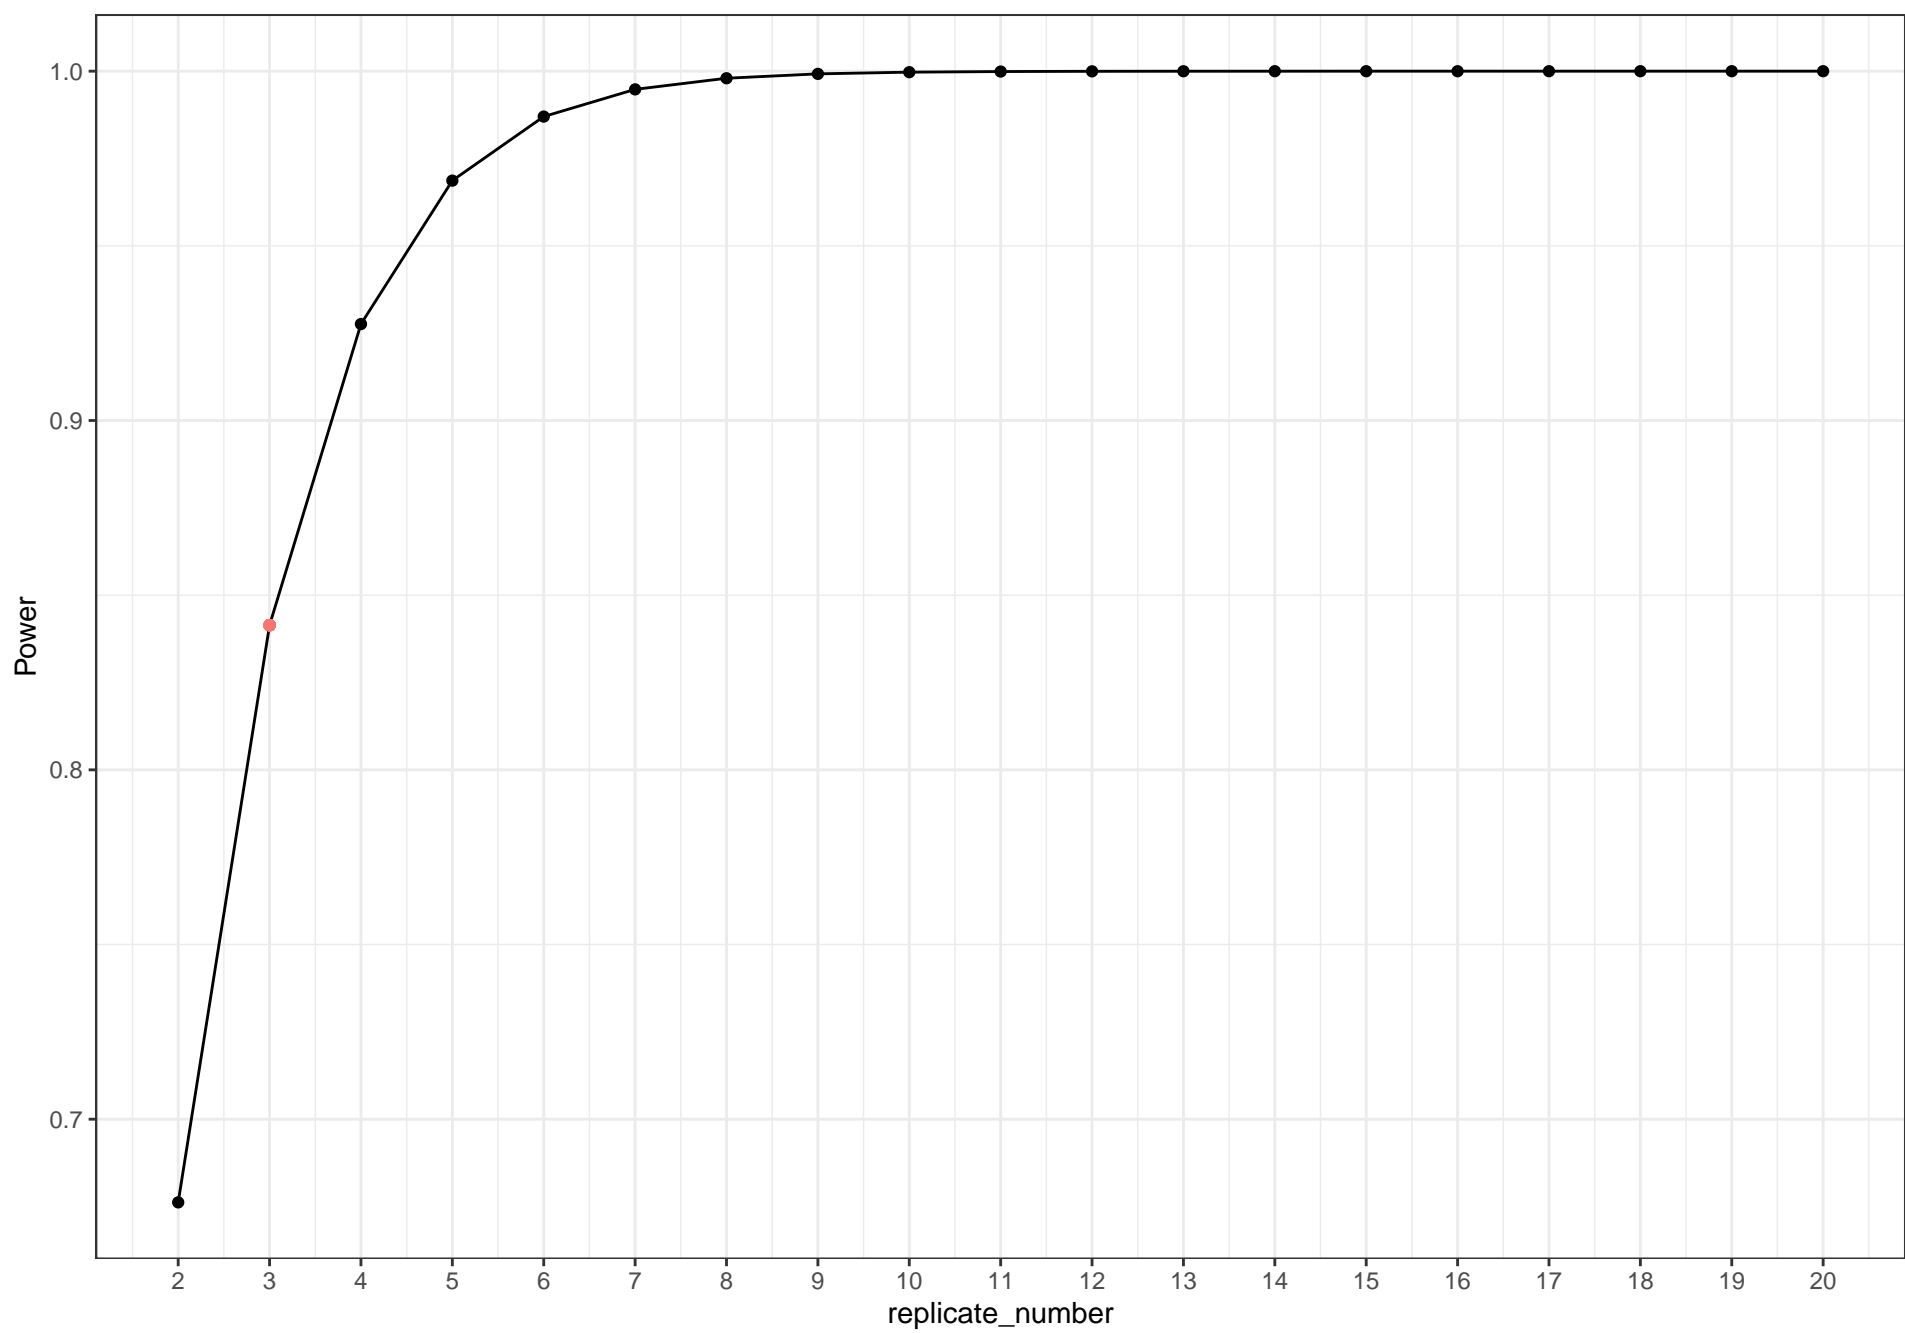

Supplement: Power_analysis-StaffSS.zip [file Power_analysis-StaffSS.zip]

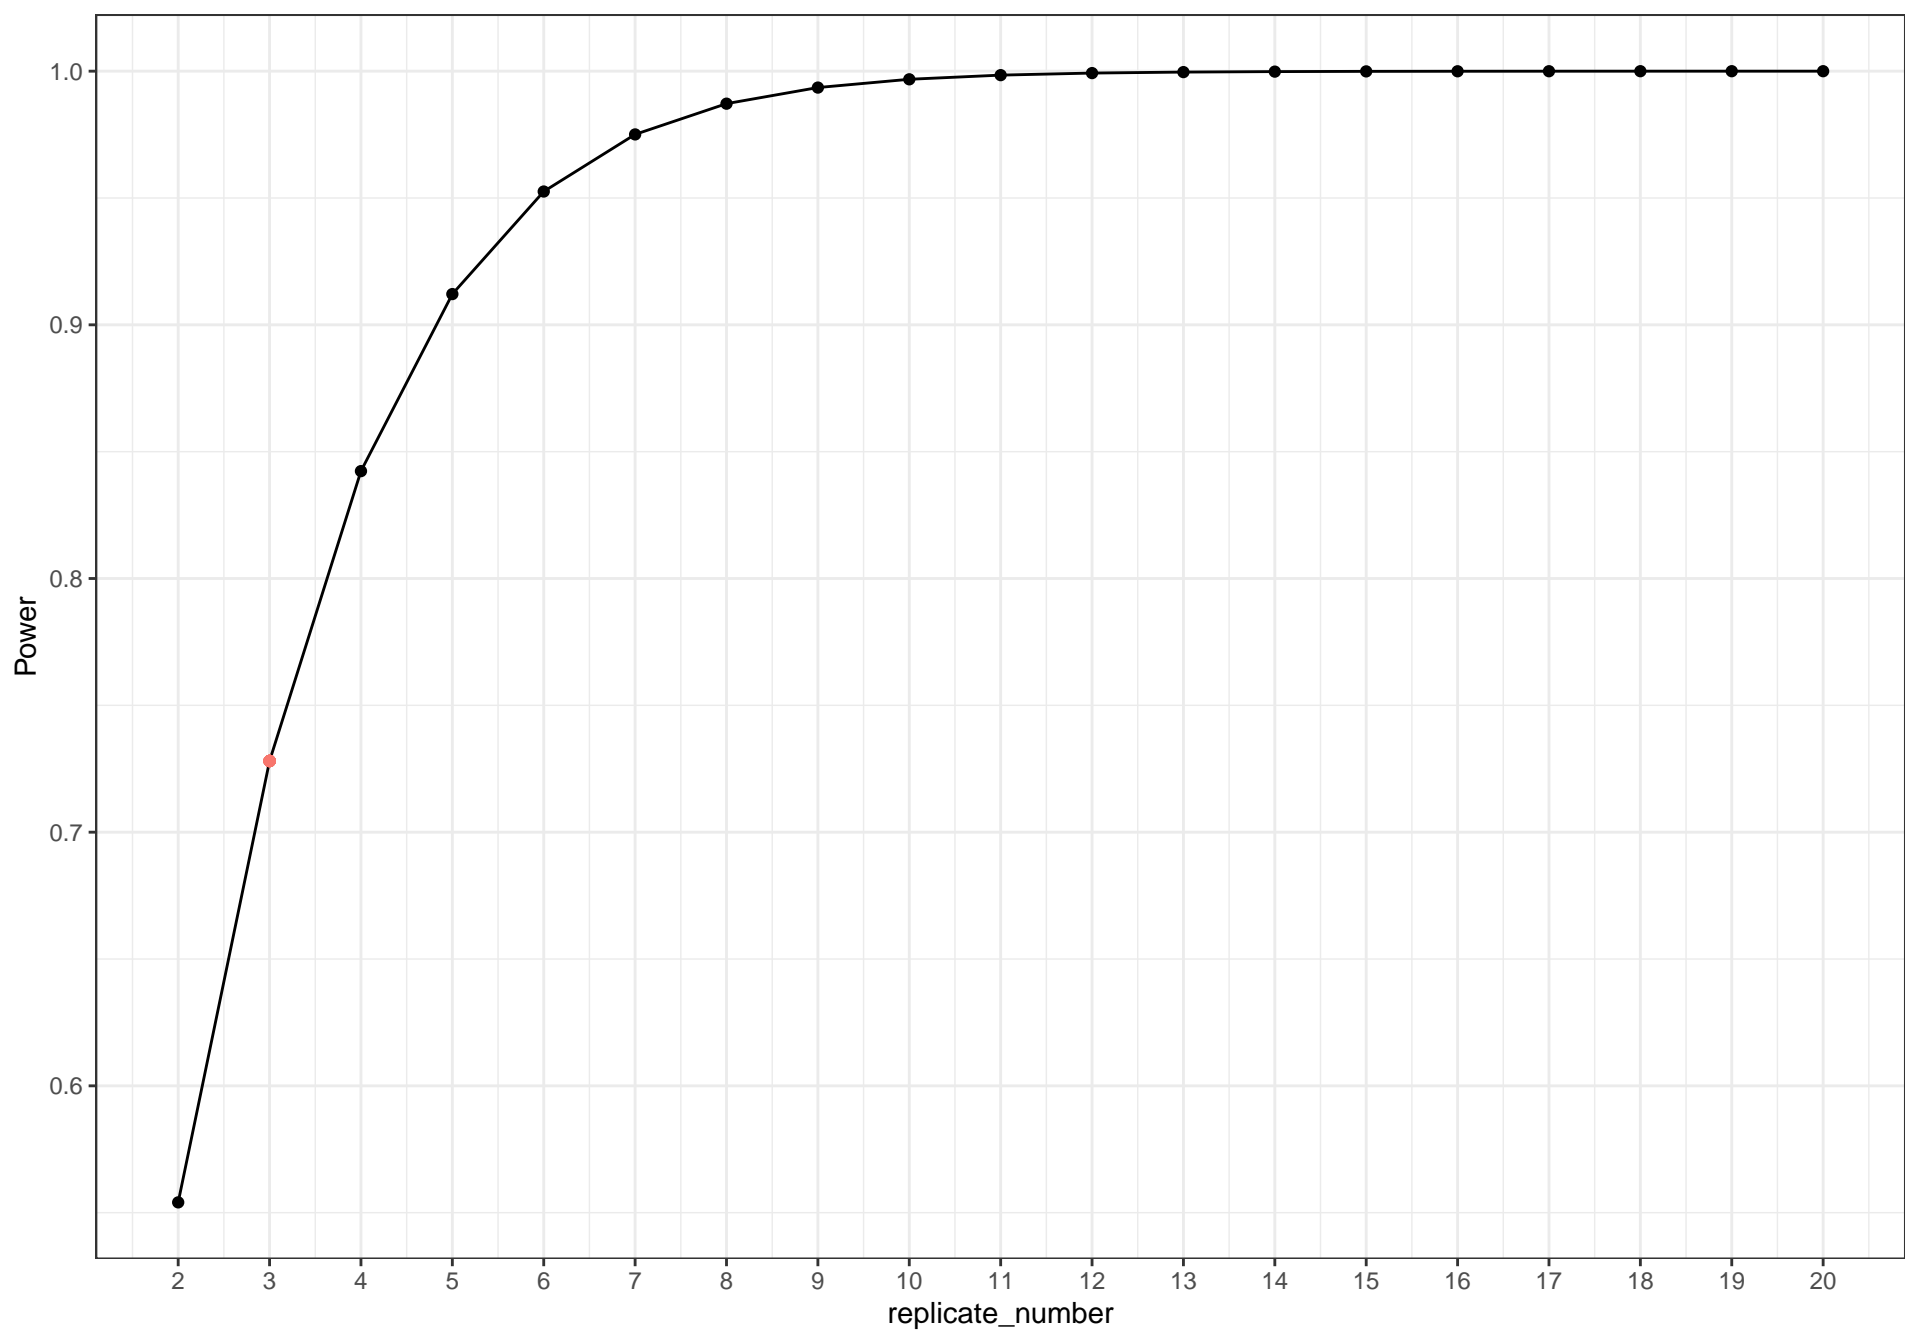

Supplement: Power_analysis-StaffSS.zip [file Power_analysis-StaffSS.zip]
